# Supplementary material for: Cytotoxic metabolites from the endophytic fungus Penicillium sp. ArD1 derived from Corchorus olitorius seeds
Source: Research Square preprint supplement (doi:10.21203/rs.3.rs-8550074/v1), 2026-01-21

**Cytotoxic metabolites from the endophytic fungus** ***Penicillium* sp. ArD1 derived from *Corchorus olitorius*** **seeds**

Arwa Mortada Ahmeda, Islam M.Abdel-Rahmanb, Jiabao Zhangc,Jianye Zhangc, Jun Wud, Usama Ramadan Abdelmohsena,e*, Mostafa A. Fouade,f, Basma Khalaf Mahmoude,f***

aDepartment of Pharmacognosy, Faculty of Pharmacy, Deraya University, 61111 New-Minia City, Egypt

bDepartment of Pharmaceutical Chemistry, Faculty of Pharmacy, Deraya University, 61111 New-Minia, Egypt

cGuangzhou Municipal and Guangdong Provincial Key Laboratory of Molecular Target & Clinical Pharmacology, the NMPA and State Key Laboratory of Respiratory Disease, School of Pharmaceutical Sciences and the Fifth Affiliated Hospital, Guangzhou Medical University, Guangzhou 511436, China.

dGuangdong Key Laboratory for Research and Development of Natural Drugs, College of Pharmacy, Guangdong Medical University, Dongguan, 523808, China.

e Department of Pharmacognosy, Faculty of Pharmacy, Minia University, Minia, 61519, Egypt.

f Department of Pharmacognosy, Faculty of Pharmacy, Minia National University (MNU), New- Minia, Egypt.

** correspondence .*Usama Ramadan Abdelmohsen, **E-mail**: [usama.ramadan@mu.edu.eg](mailto:usama.ramadan@mu.edu.eg)

Basma Khalaf Mahmoud, **E-mail**:basmaakh88@yahoo.com

**ABSTRACT**

*Corchorus olitorius* L. seeds are a rich source of endophytic fungi, which afford many cytotoxic secondary metabolites. The fungus was taxonomically identified via sequencing as *Penicillium* sp*.* ArD1 (closely related to *P. oxalicum*). The fungal extract was subjected to chromatographic separation, leading to the isolation and structural elucidation of four compounds: two naphtho-pyrones ((**1**) and (**2**)), the cyclic pentapeptide malformin A1 (**3**), and the fatty acid Tridecanoic acid (**4**). Structures were confirmed using extensive 1D and 2D NMR as well as mass spectrometry. The isolated metabolites were evaluated for cytotoxicity against human lung carcinoma cell lines A549 and H1299. malforminA1 **(3)** demonstrated the highest and most potent activity, yielding IC50 values of 0.75±0.02 and 0.85±0.14 µM, respectively. In addition, malformin A1 revealed different hydrogen bonding and hydrophobic interactions within the enzyme’s active site of matrix metalloproteinase-9 (MMP-9) in the molecular docking study. These findings highlight malformin **A1** from endophytic *Penicillium* sp*.* as a promising and highly potent lead compound for the development of anti-lung cancer therapeutics.

**KEYWORDS:** *Penicillium*; cytotoxic activity; endophytic fungus; secondary metabolites; naphtho-*γ*-pyrones; malformin A1.

**NMR spectra for compounds 1-3**


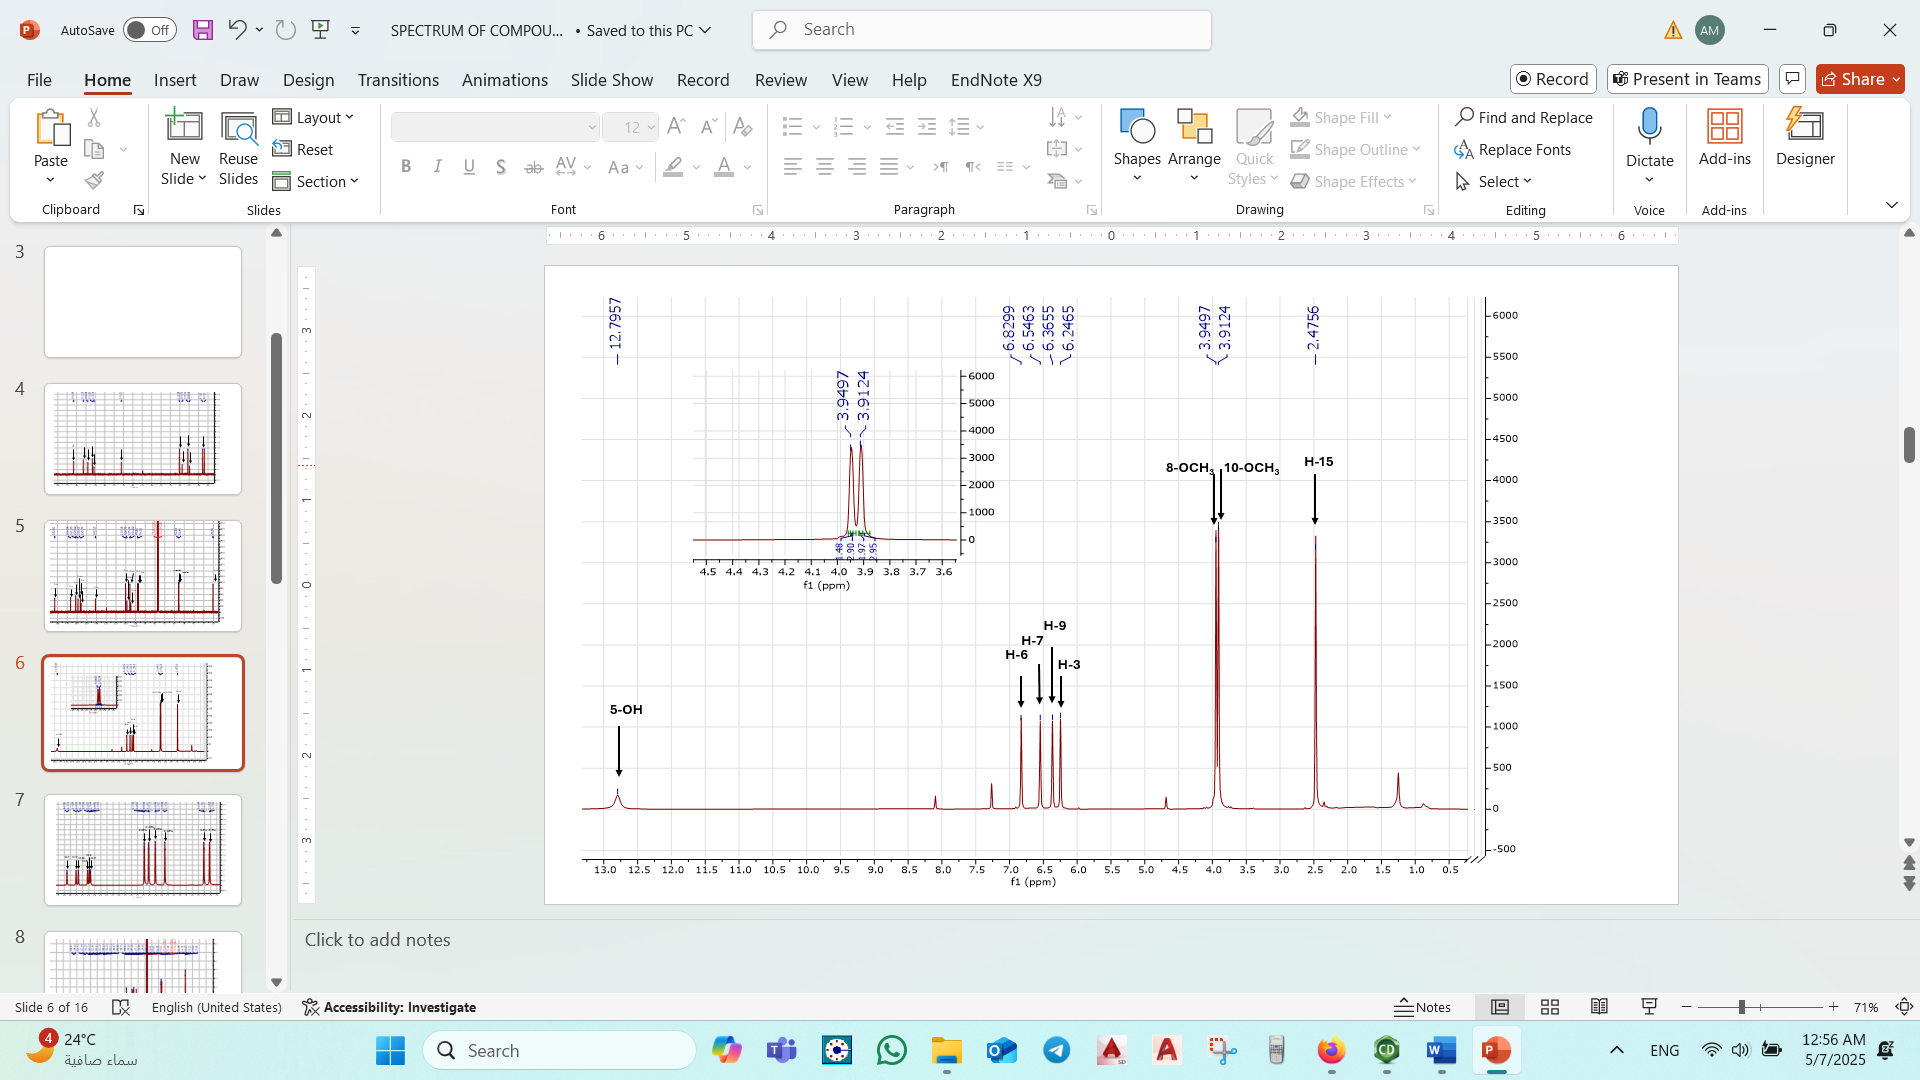


Figure **S1**. 1H NMR spectrum of Flavasperone (**1**) (400 MHz, CDCl3)


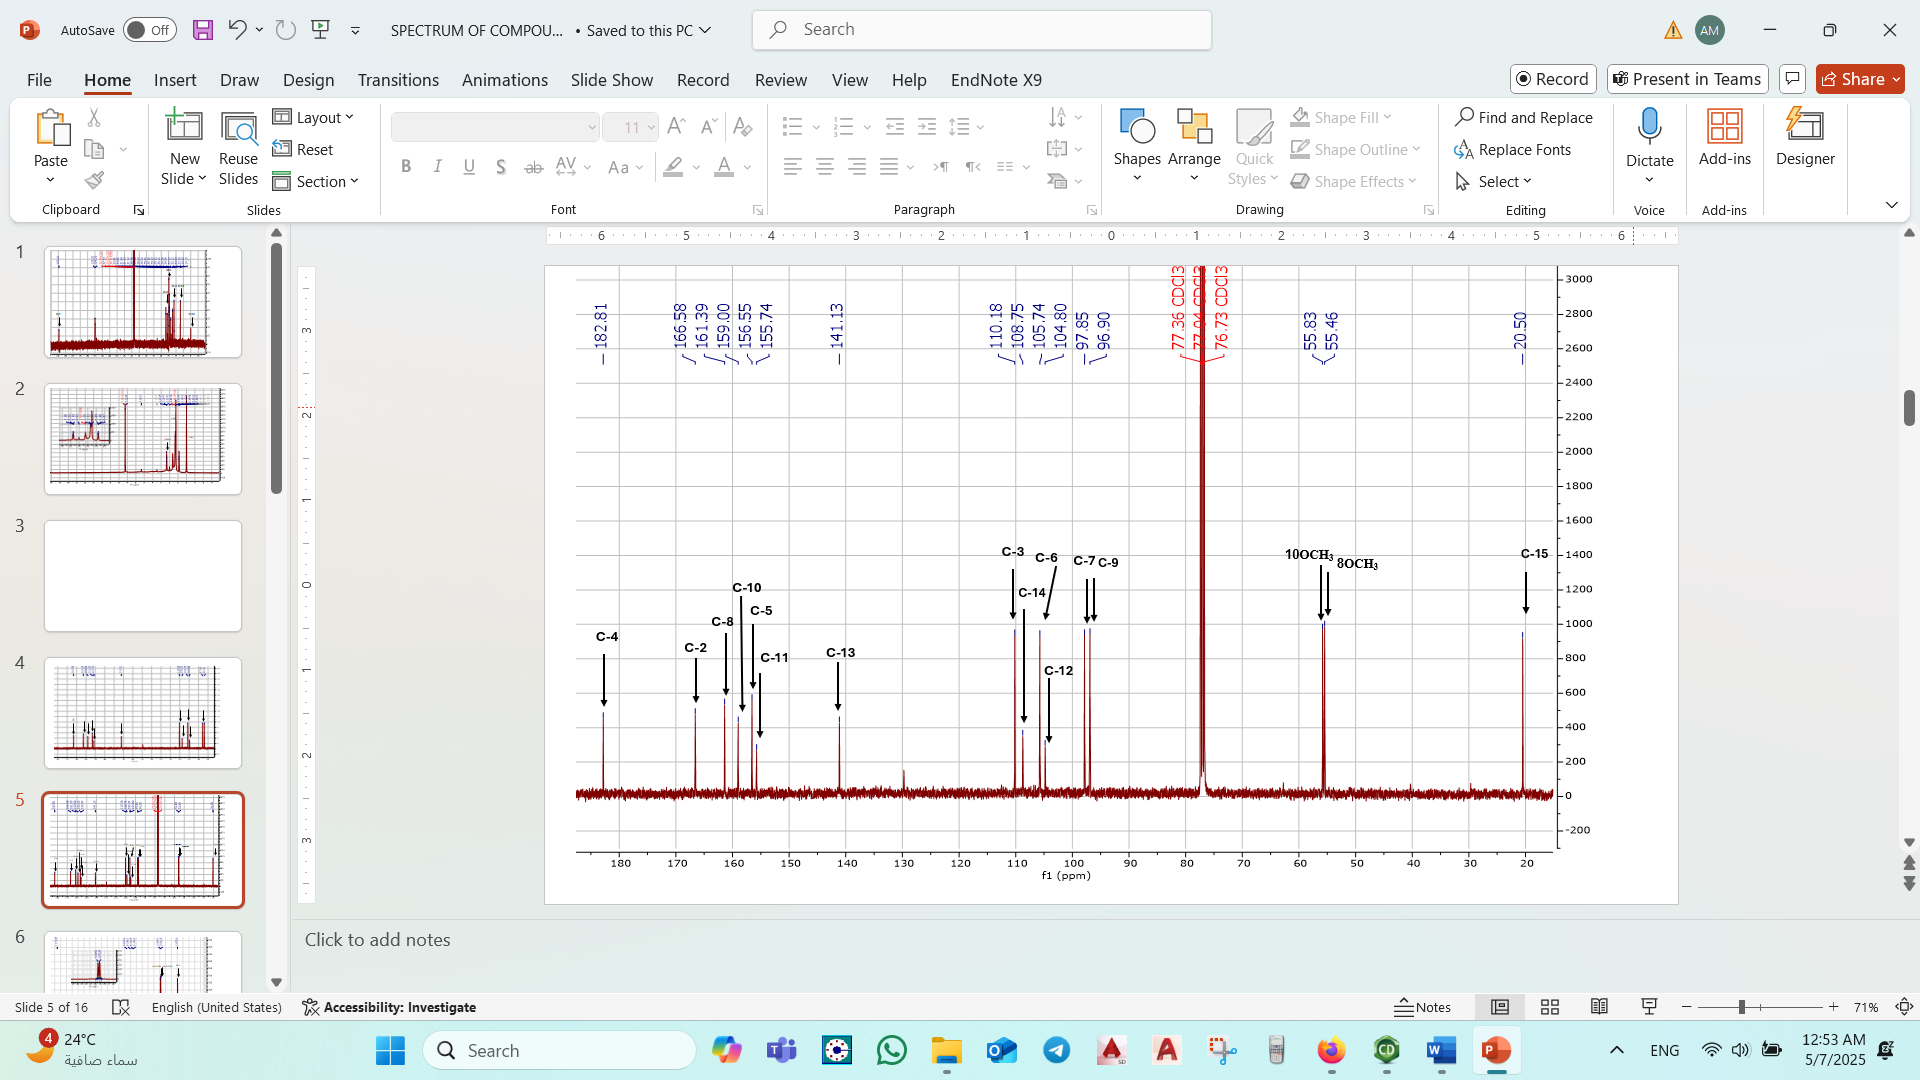


Figure **S2**. 13C NMR spectrum of Flavasperone (**1**) (100 MHz, CDCl3)


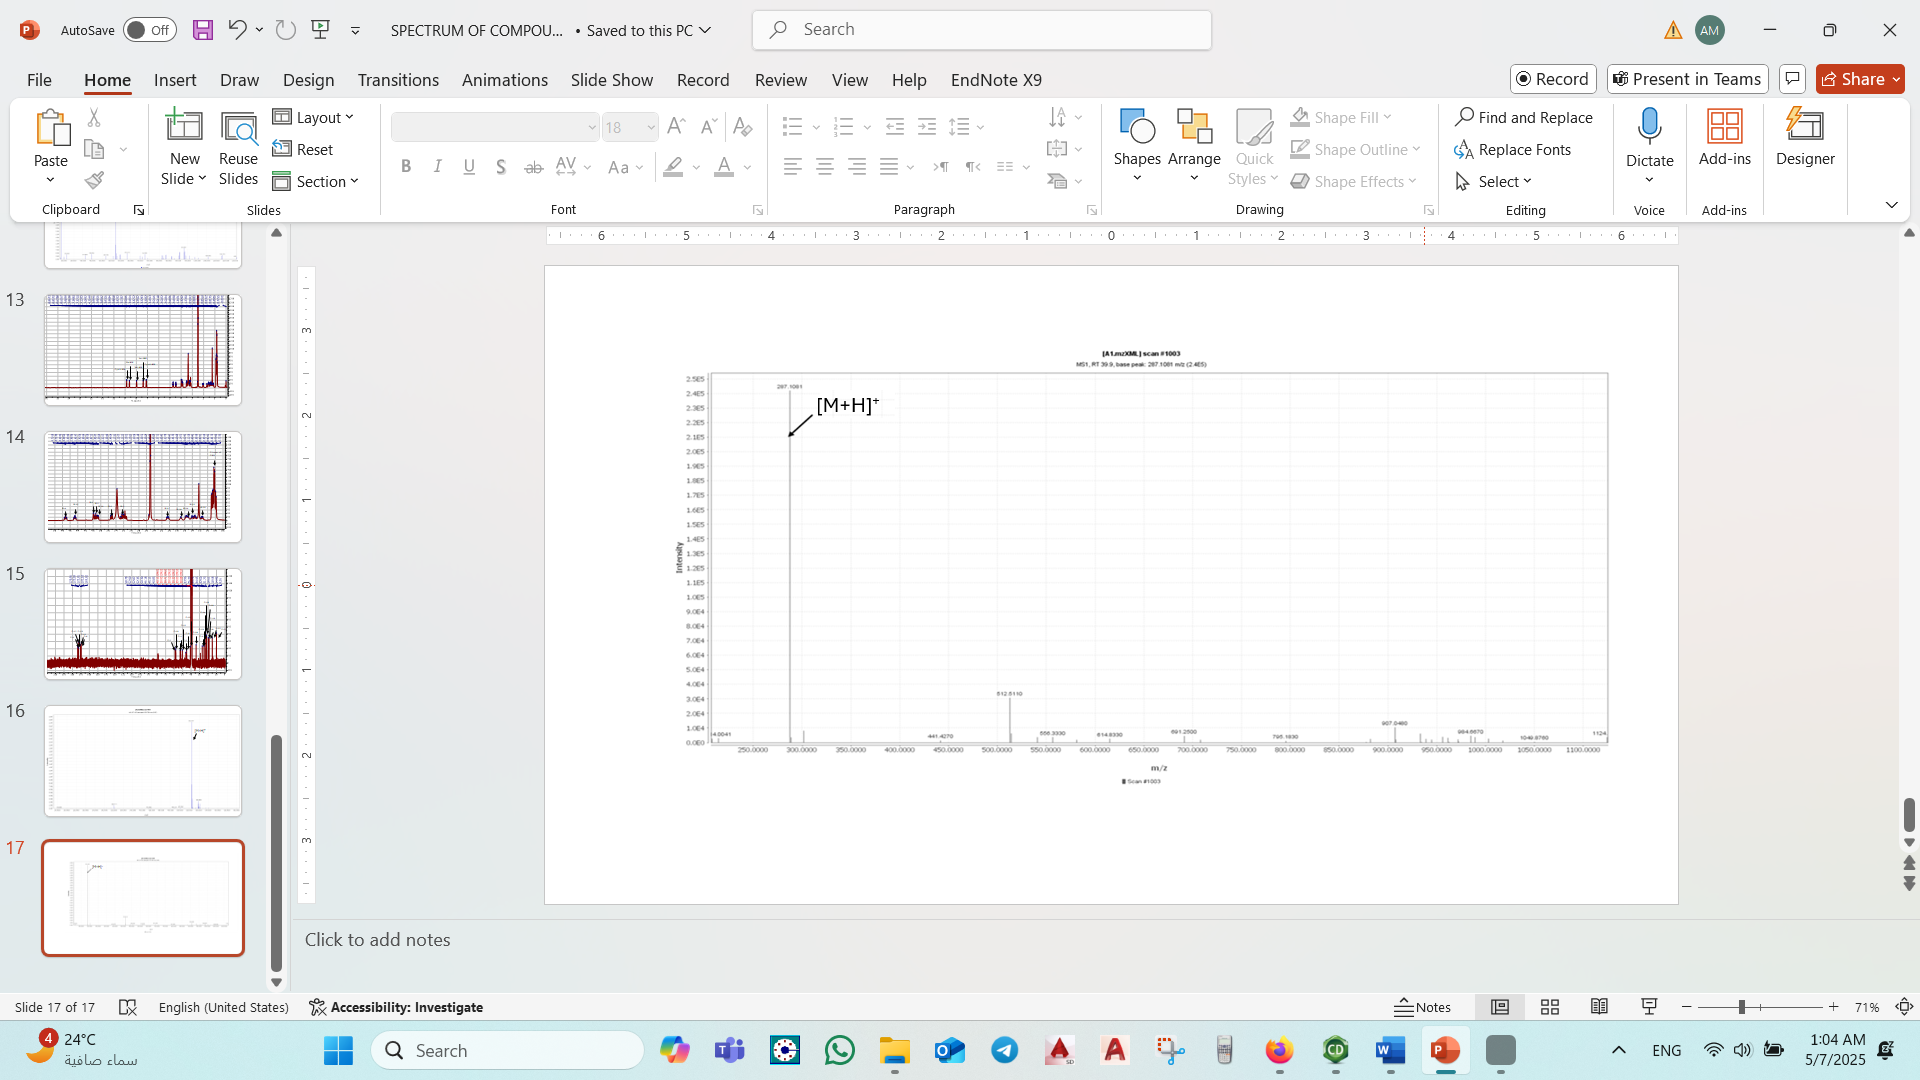


Figure **S3**.HR-ESI-MS spectrum of Flavasperone (**1**).


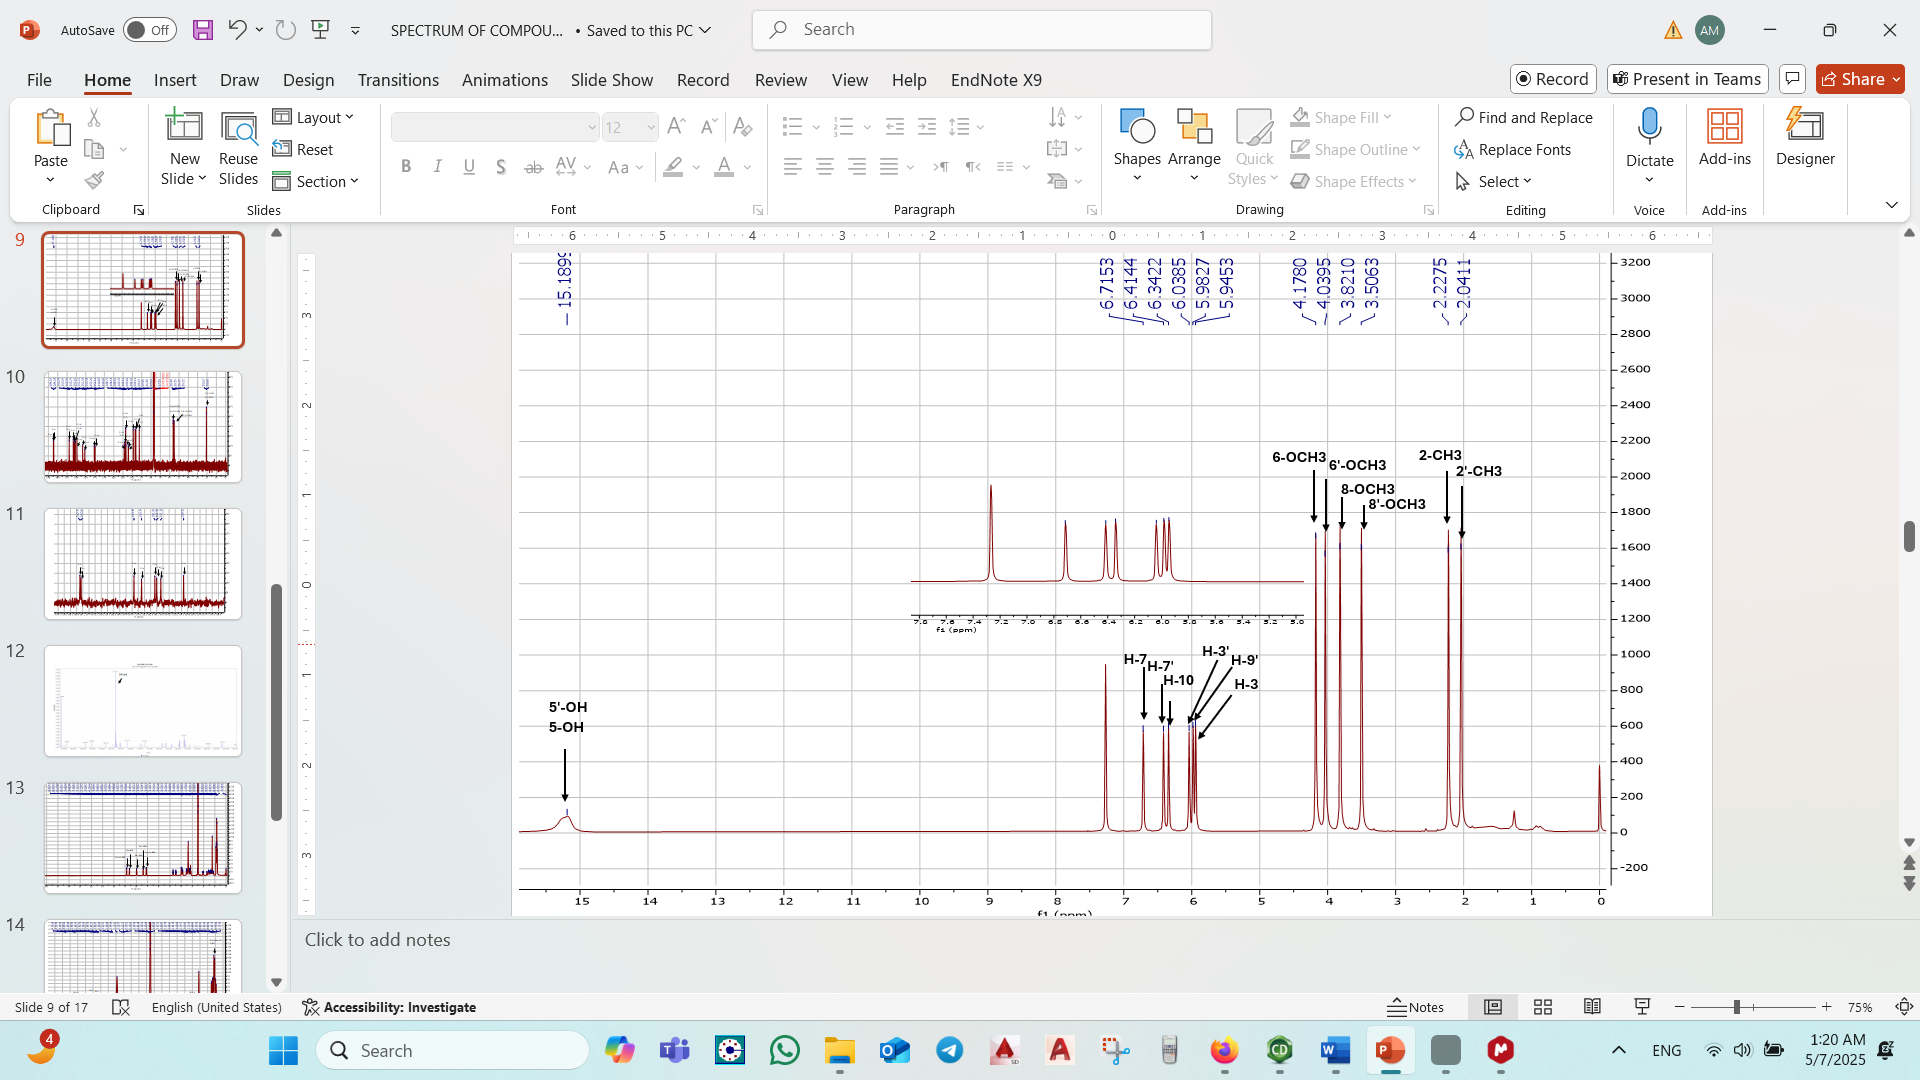


Figure **S4**. 1H NMR spectrum of Rubasperone B (**2**) (400 MHz, CDCl3)


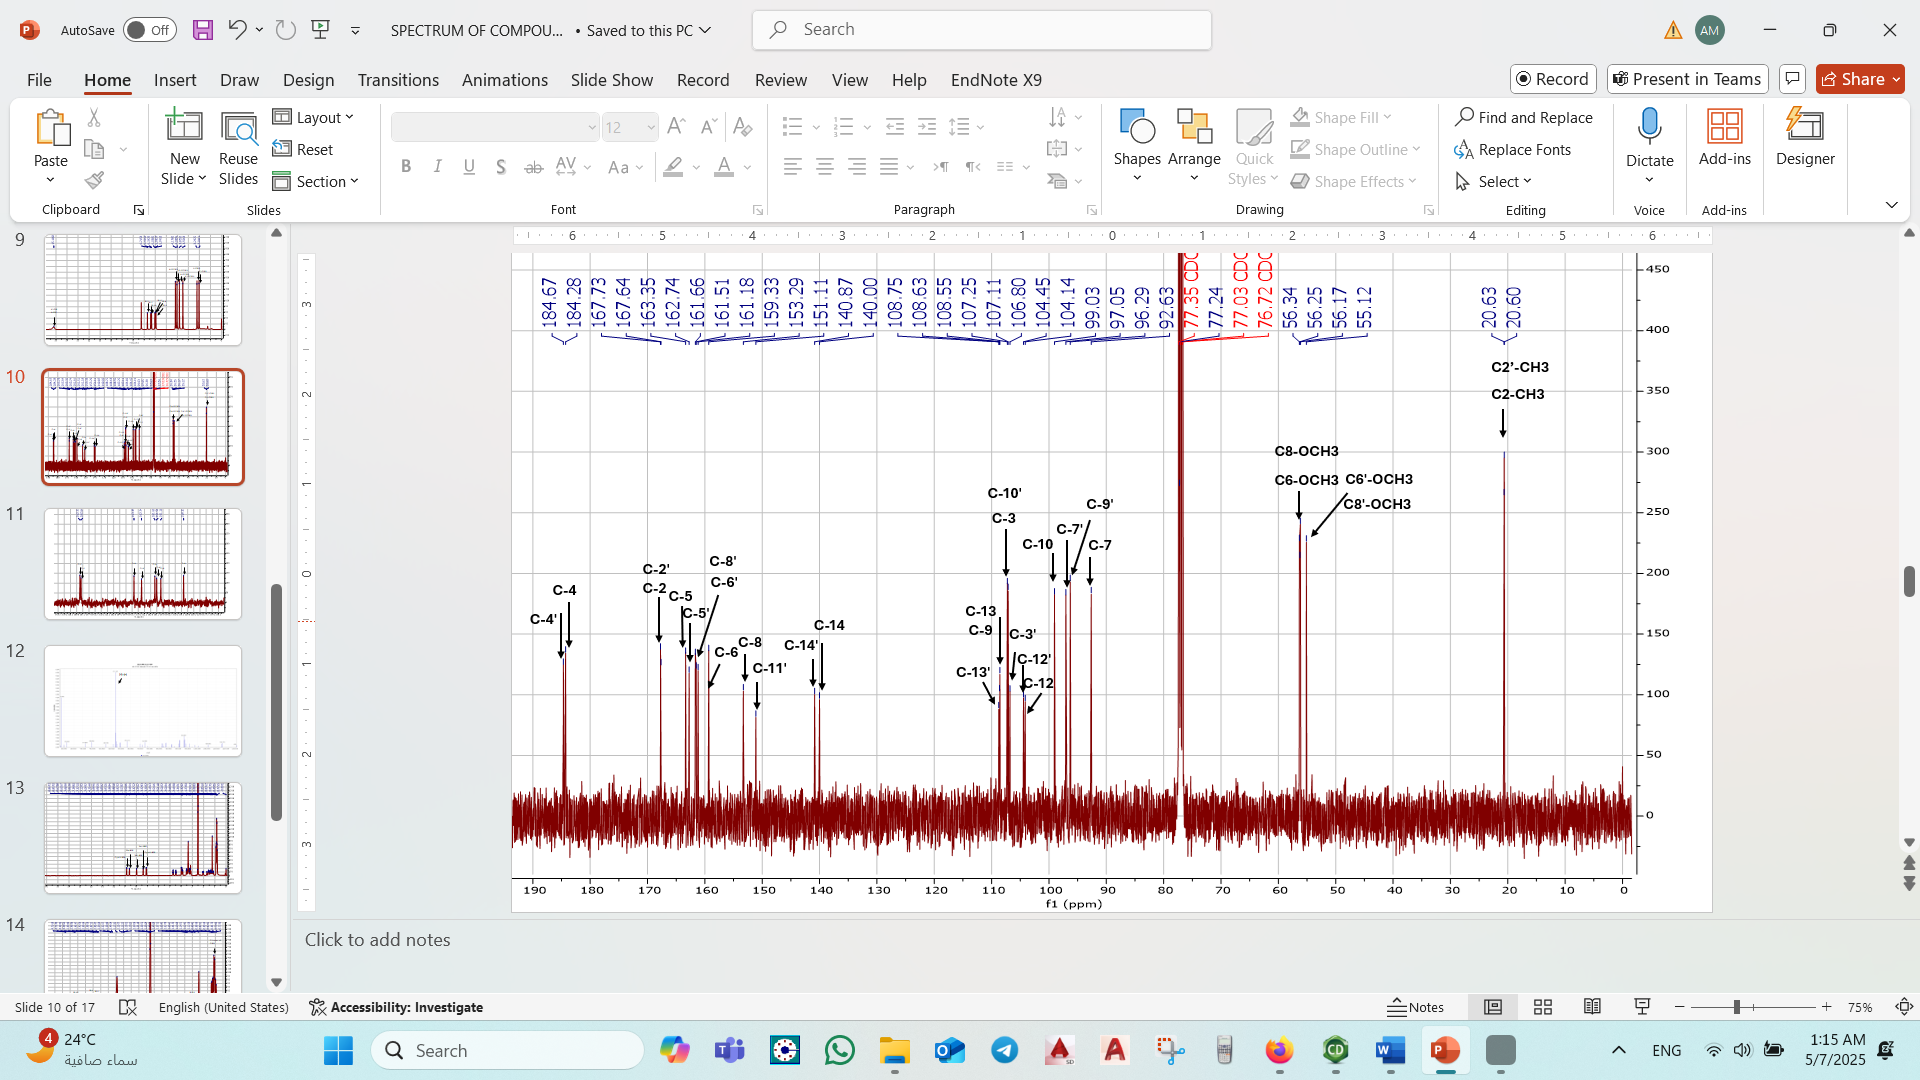


Figure **S5**. 13C NMR spectrum of Rubasperone B (**2**) (100 MHz, CDCl3)


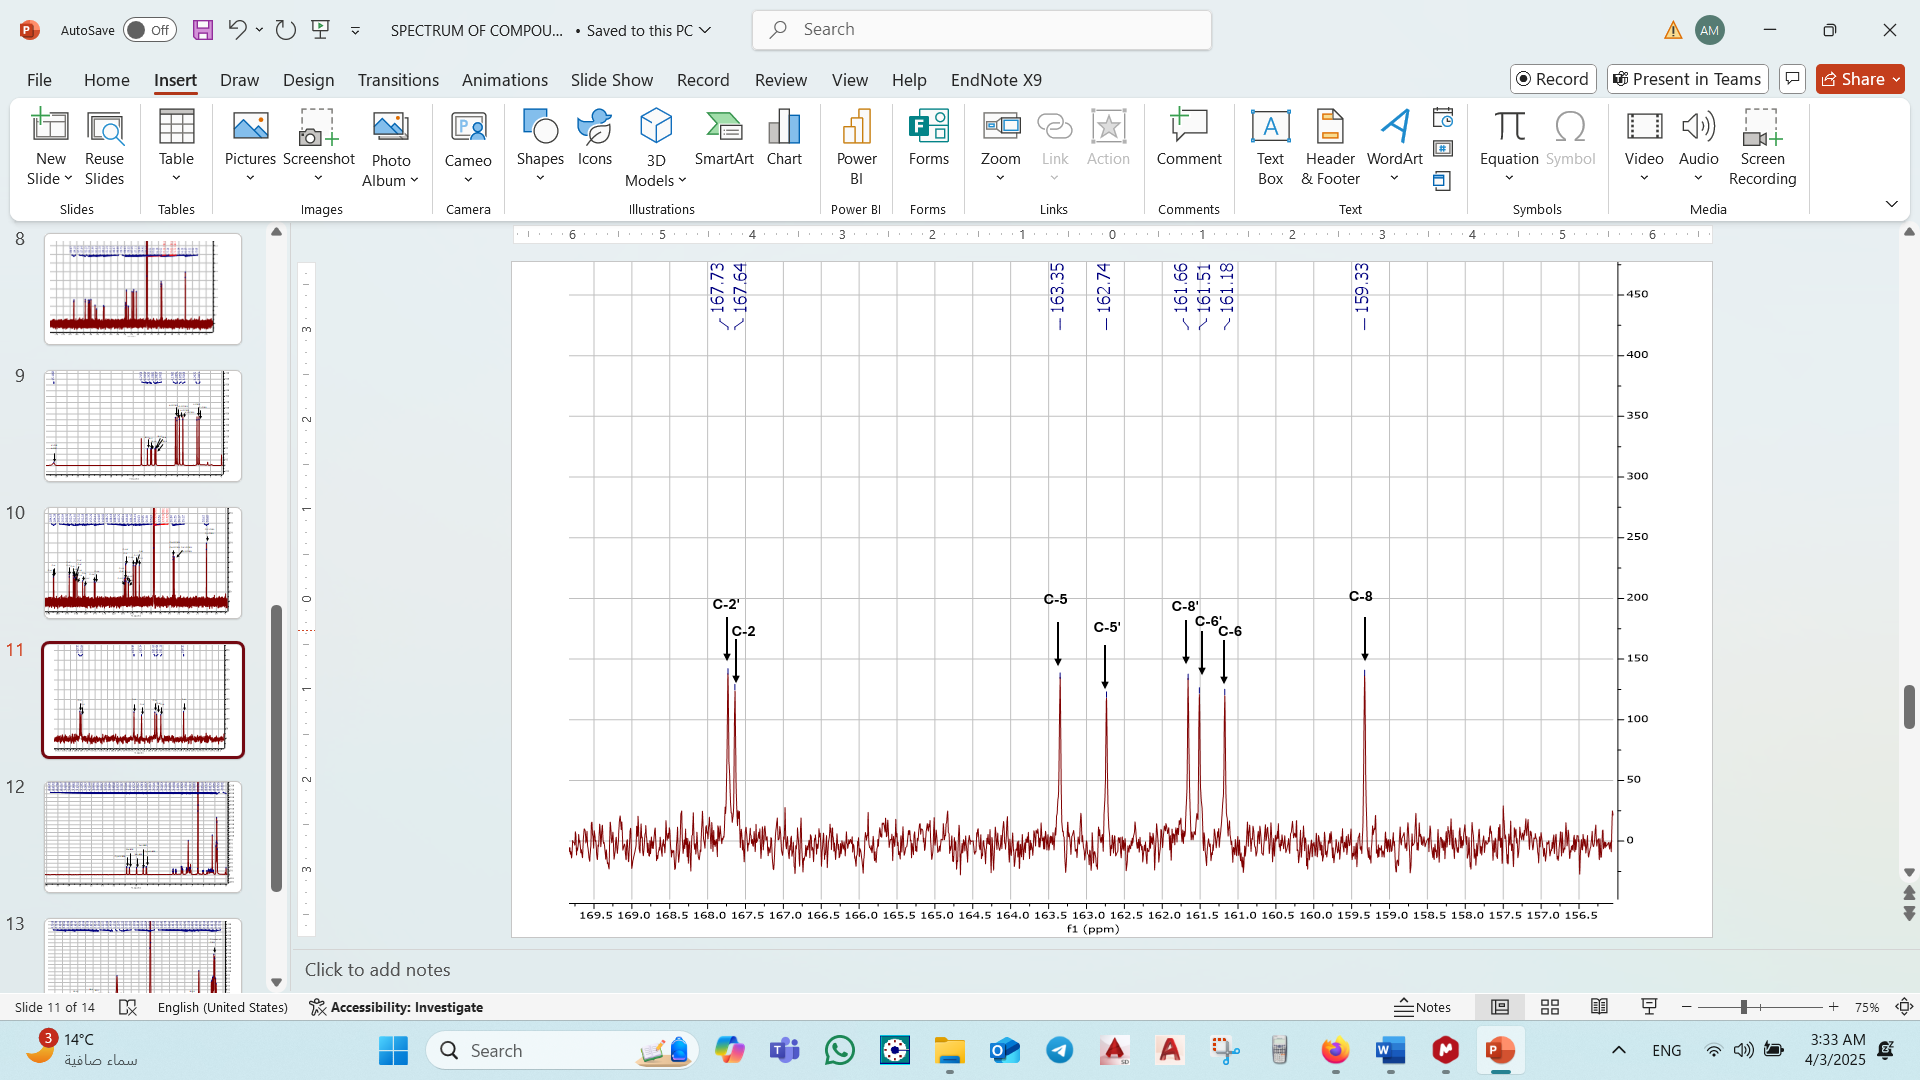


Figure **S6.** Expanded 13 C-NMR spectrum of Rubasperone B (**2**) (100 MHz, CDCl3).


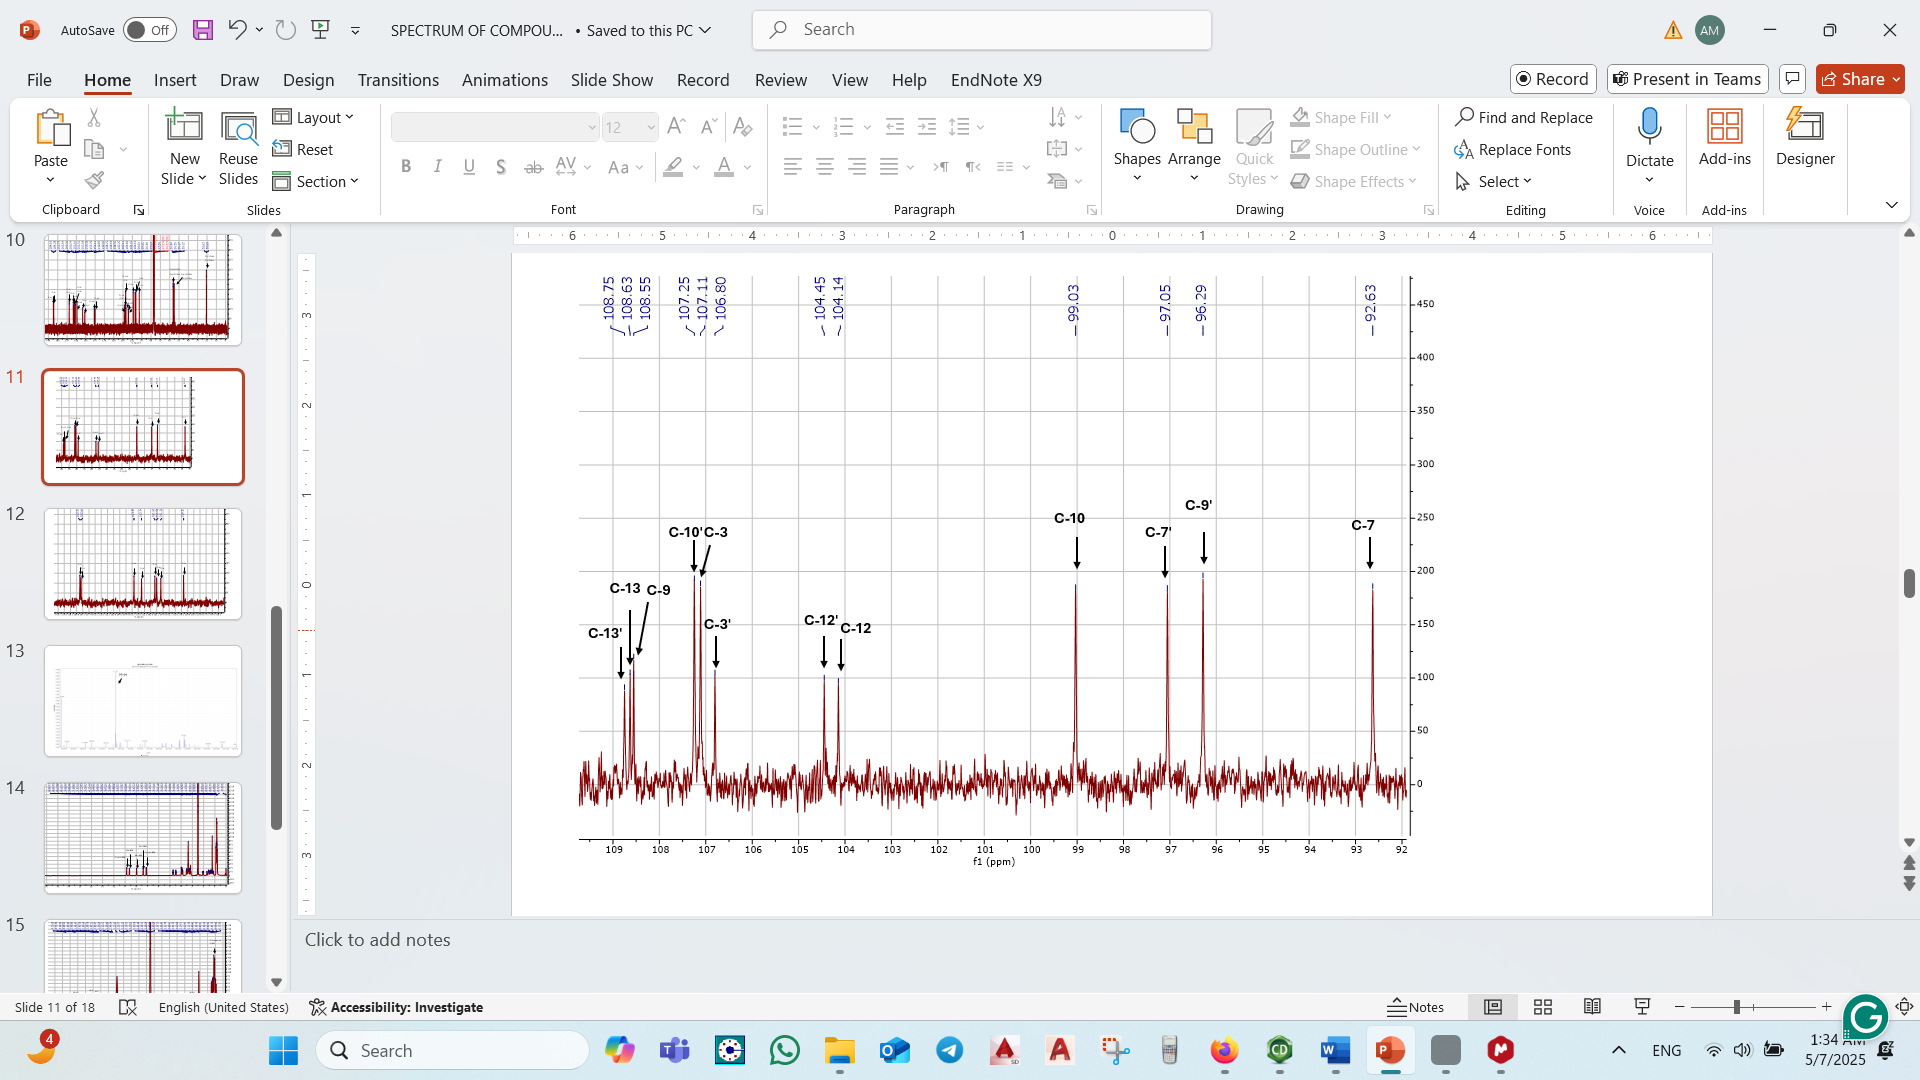


Figure **S7.** Expanded 13 C-NMR spectrum of Rubasperone B (**2**) (100 MHz, CDCl3).


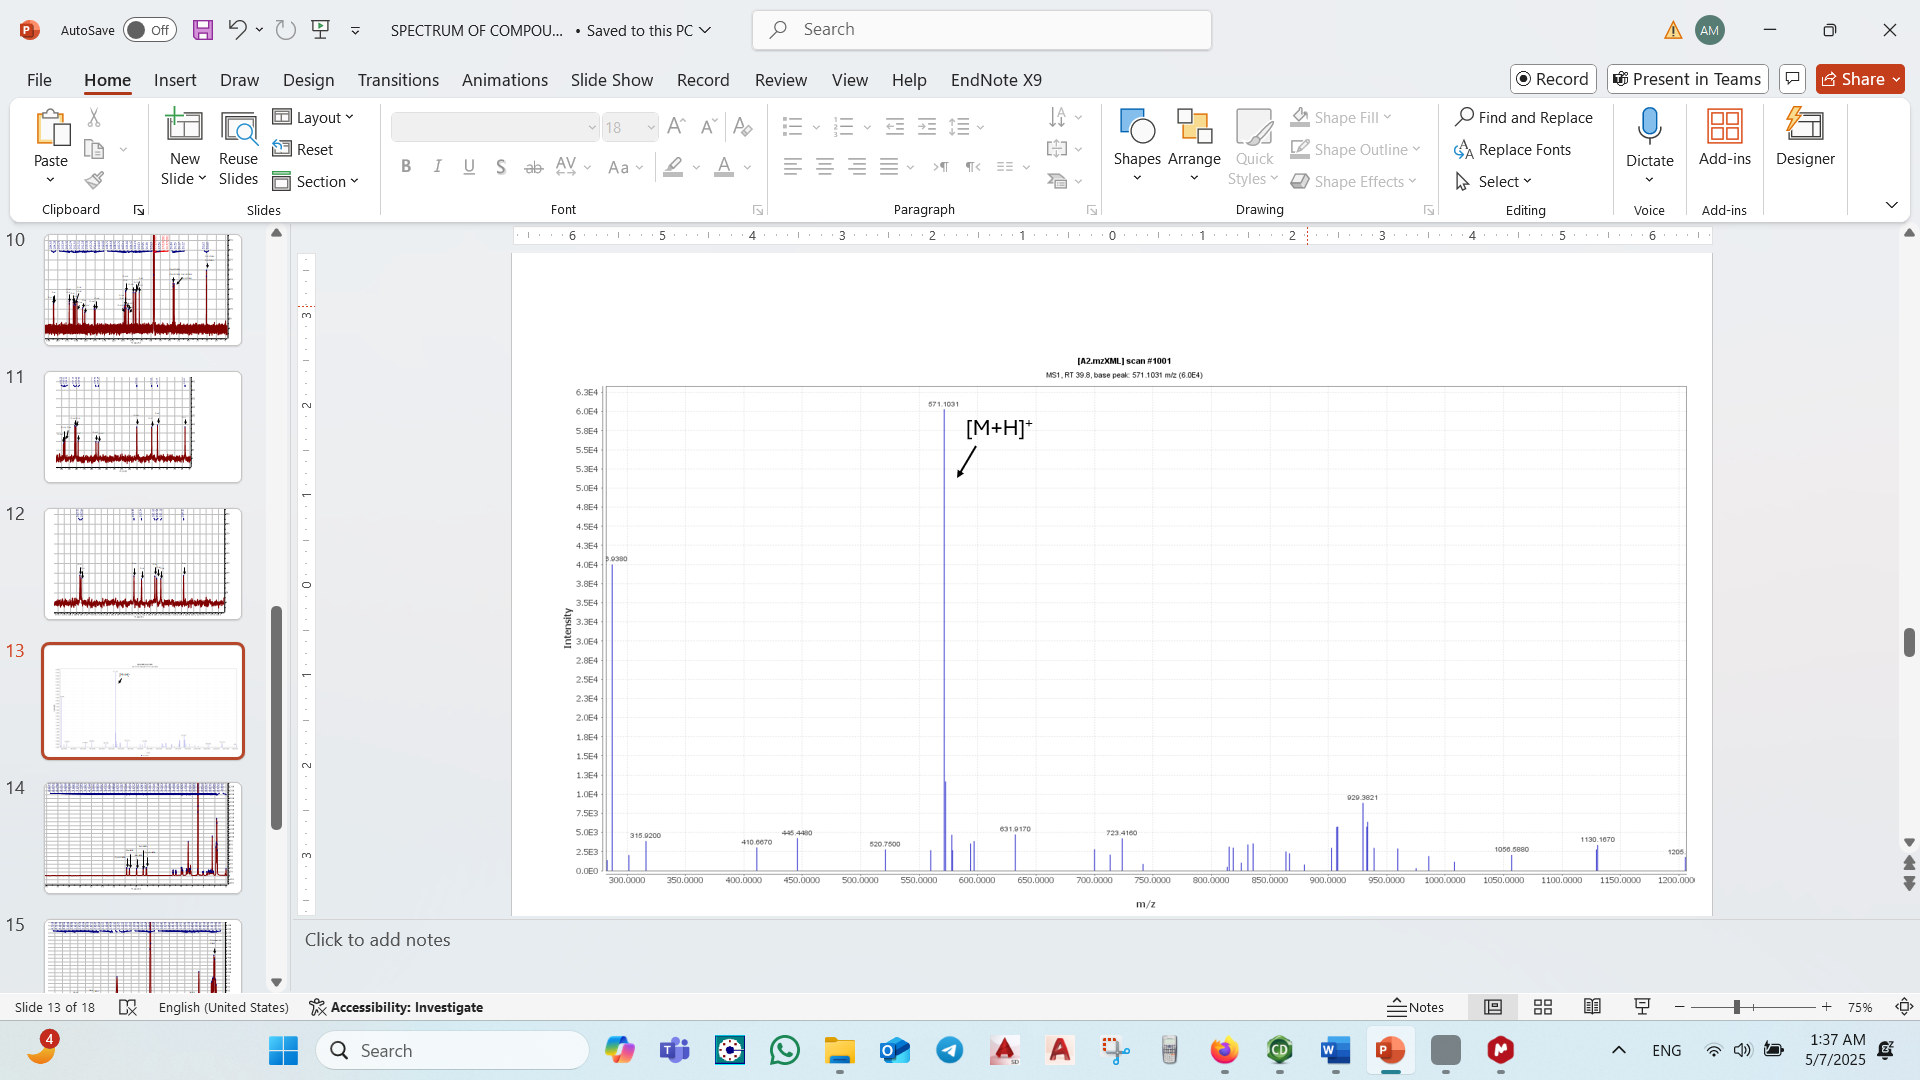


Fig **S8**. HR-ESI-MS spectrum of spectrum of Rubasperone B (**2**).


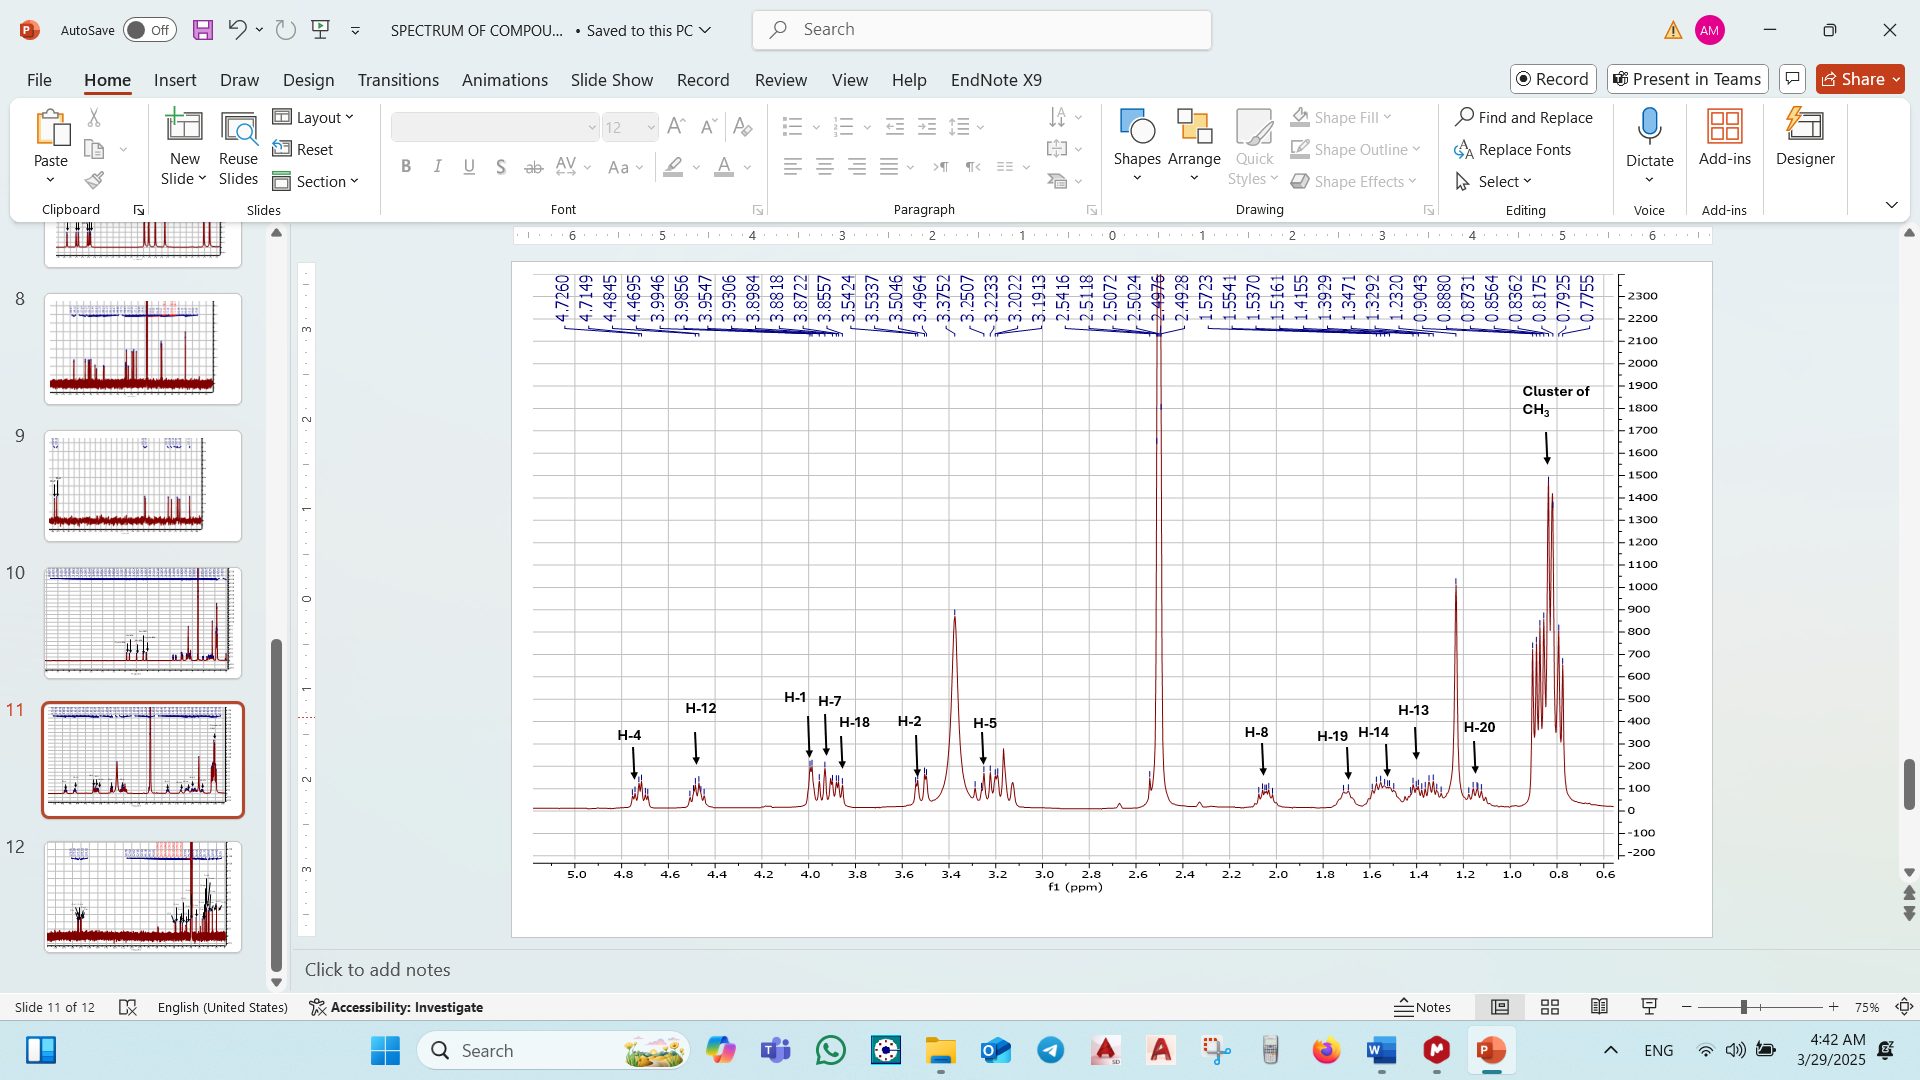


Figure **S9**. 1H-NMR spectrum of Malformin A1 (**3**) (400 MHz, DMSO-d6).


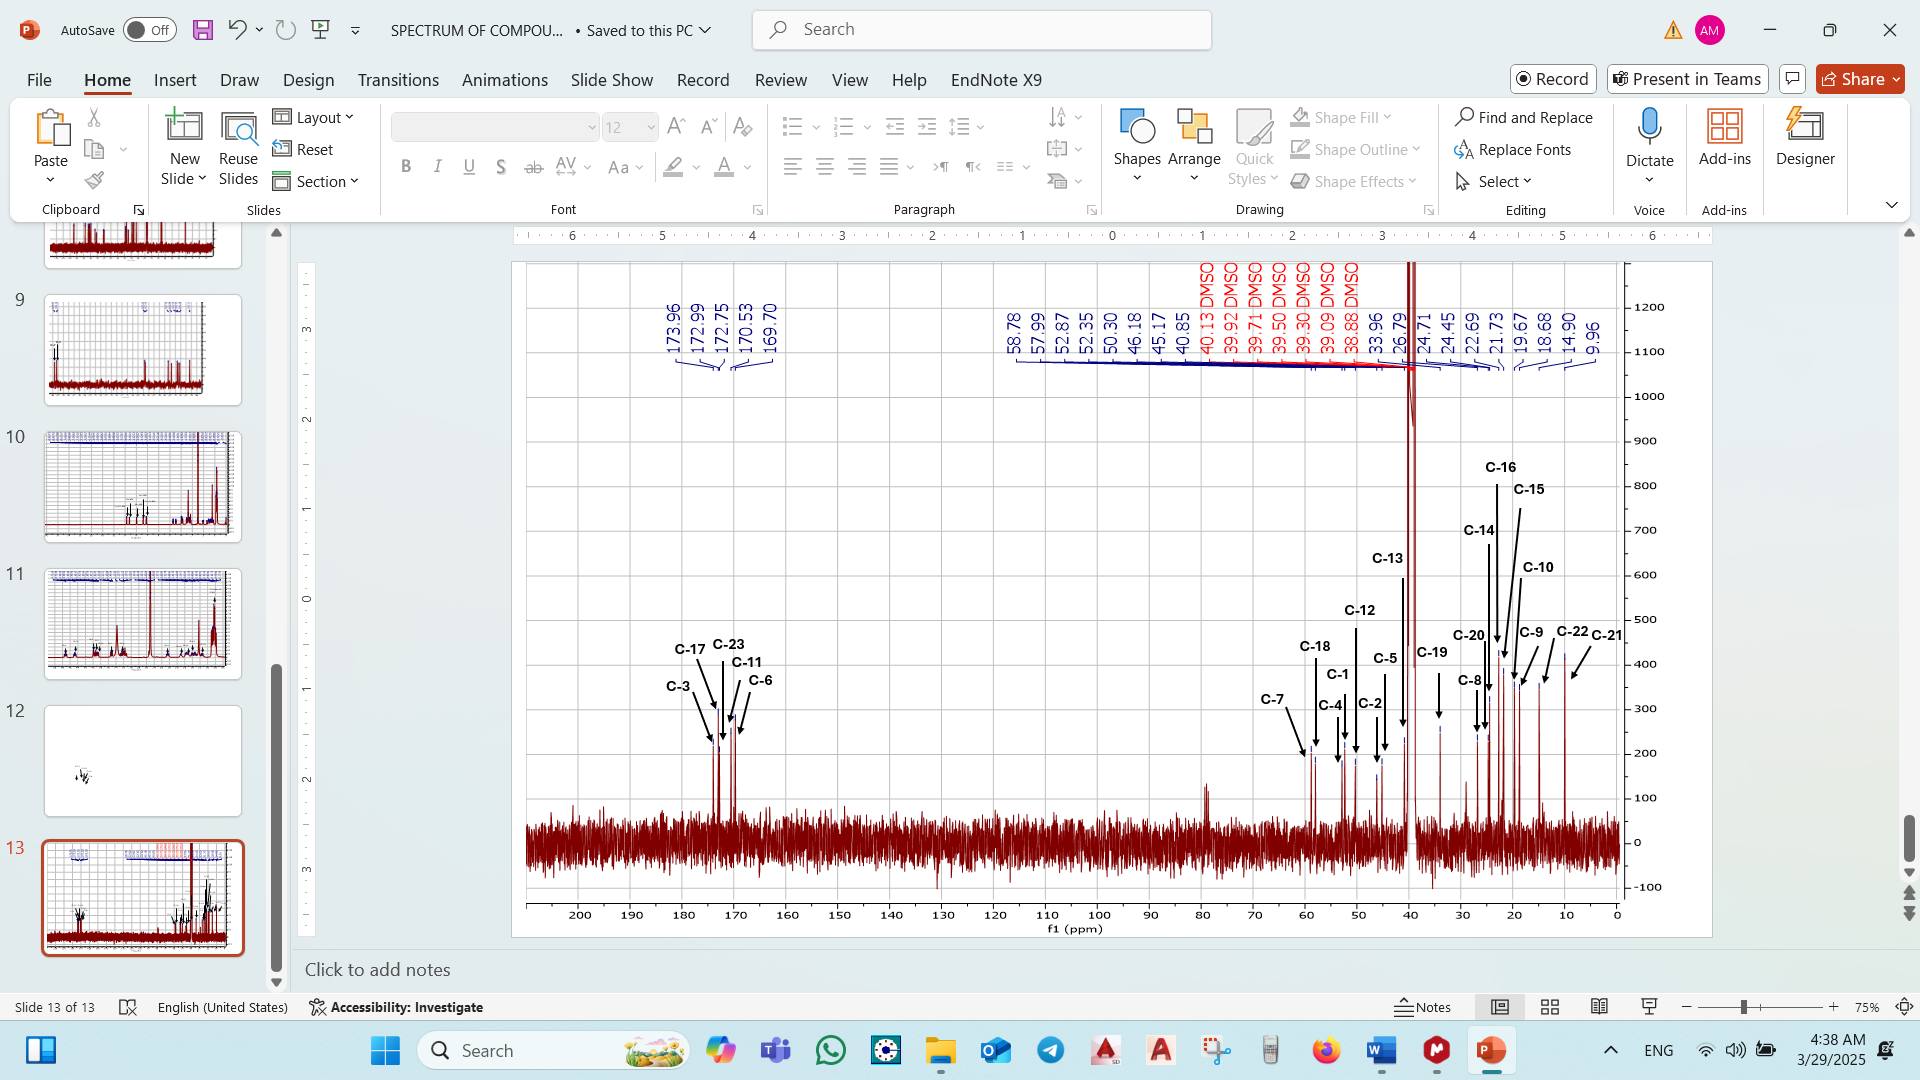


Figure **S10**. 13C-NMR spectrum of Malformin A1 (**3**) (100 MHz, DMSO-d6)

Figure **S11**. HMBC spectrum of Malformin A1 (**3**) (DMSO-d6)

Figure **S12**. 1H-1H COSY spectrum of Malformin A1 (**3**) (DMSO-d6).


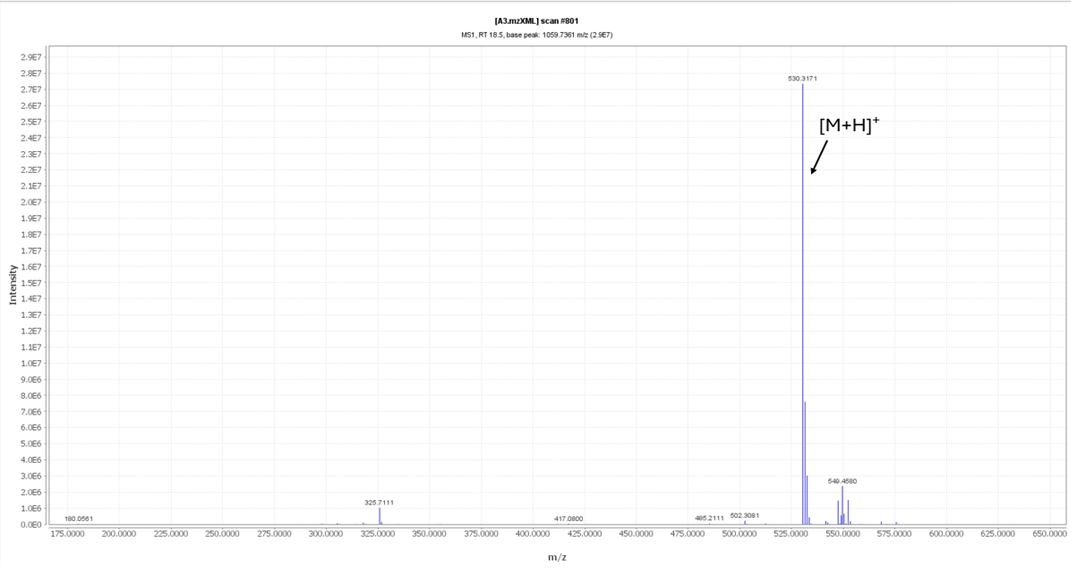


Figure **S13**. HR-ESI-MS spectrum of Malformin A1 (**3**).


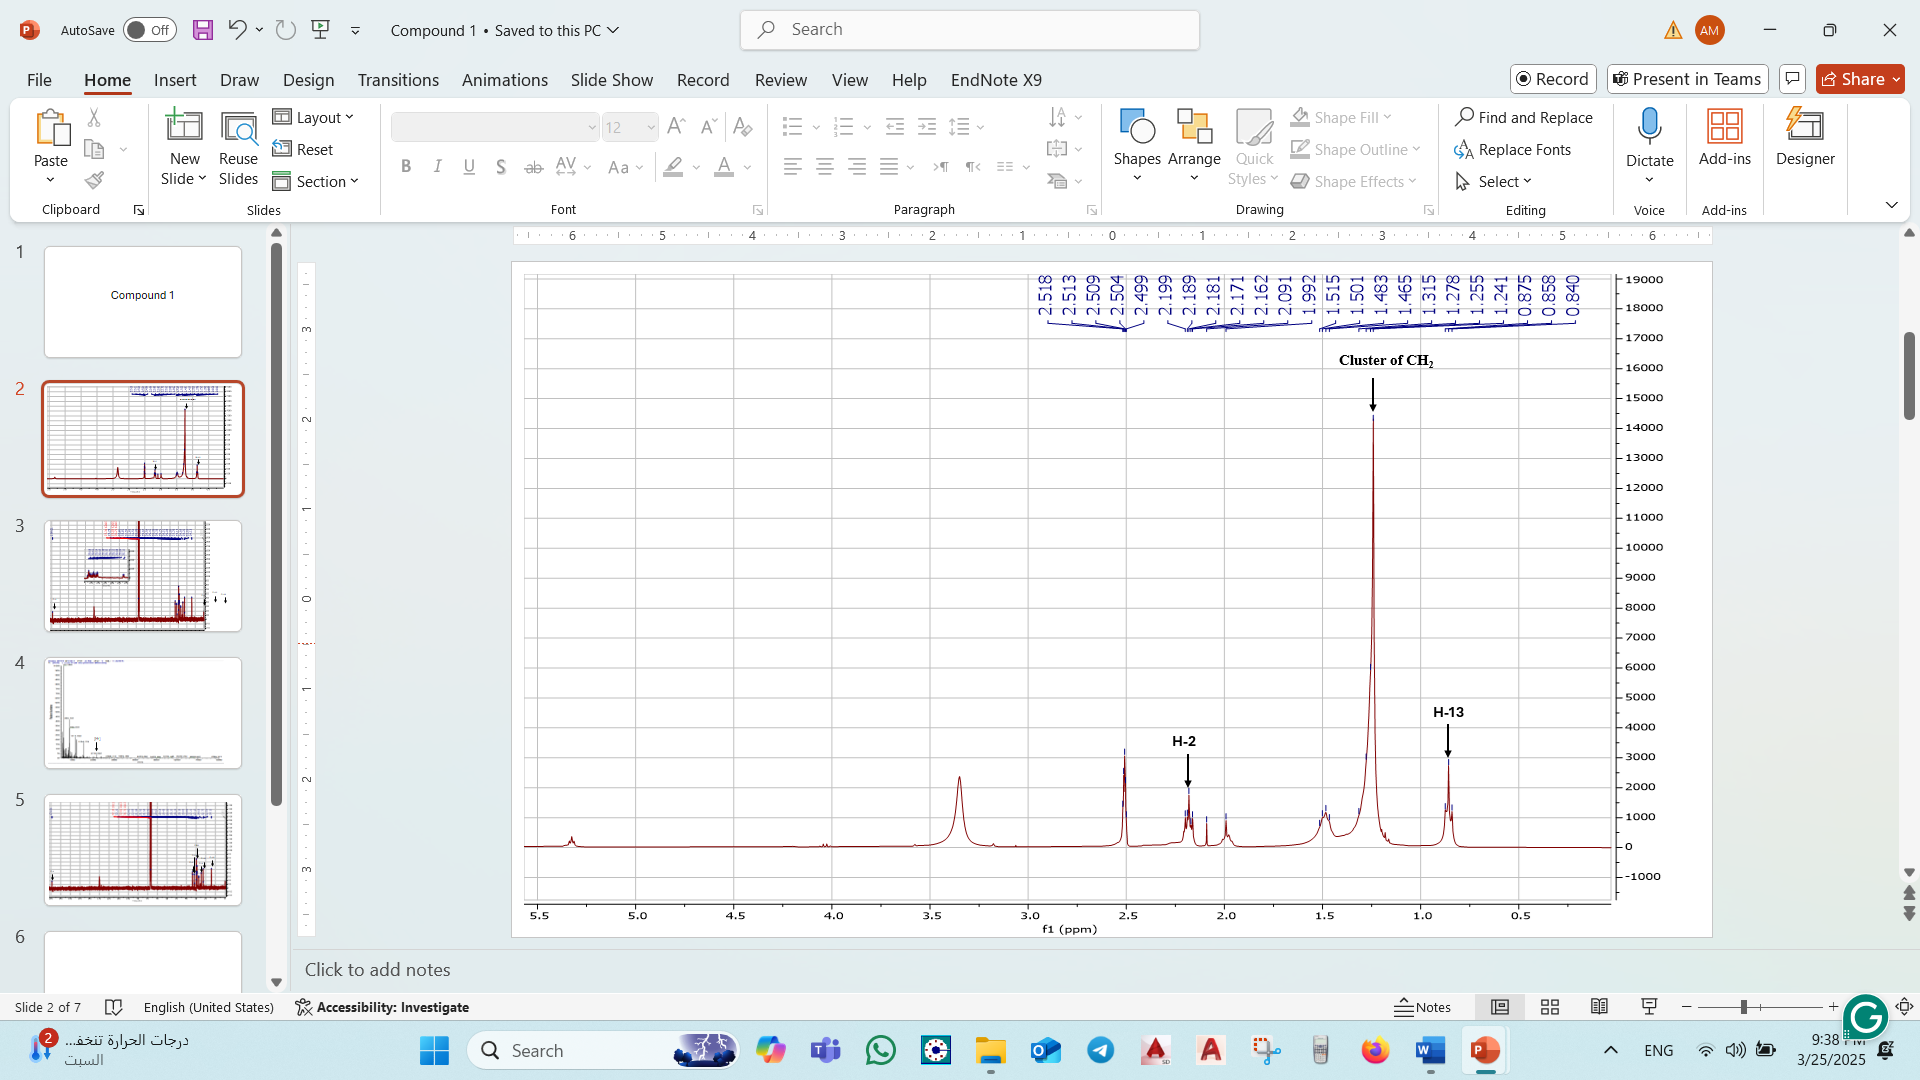


Figure **S14**. 1H-NMR spectrum of Tridecanoic acid (**4**) (400 MHz, CDCl3).


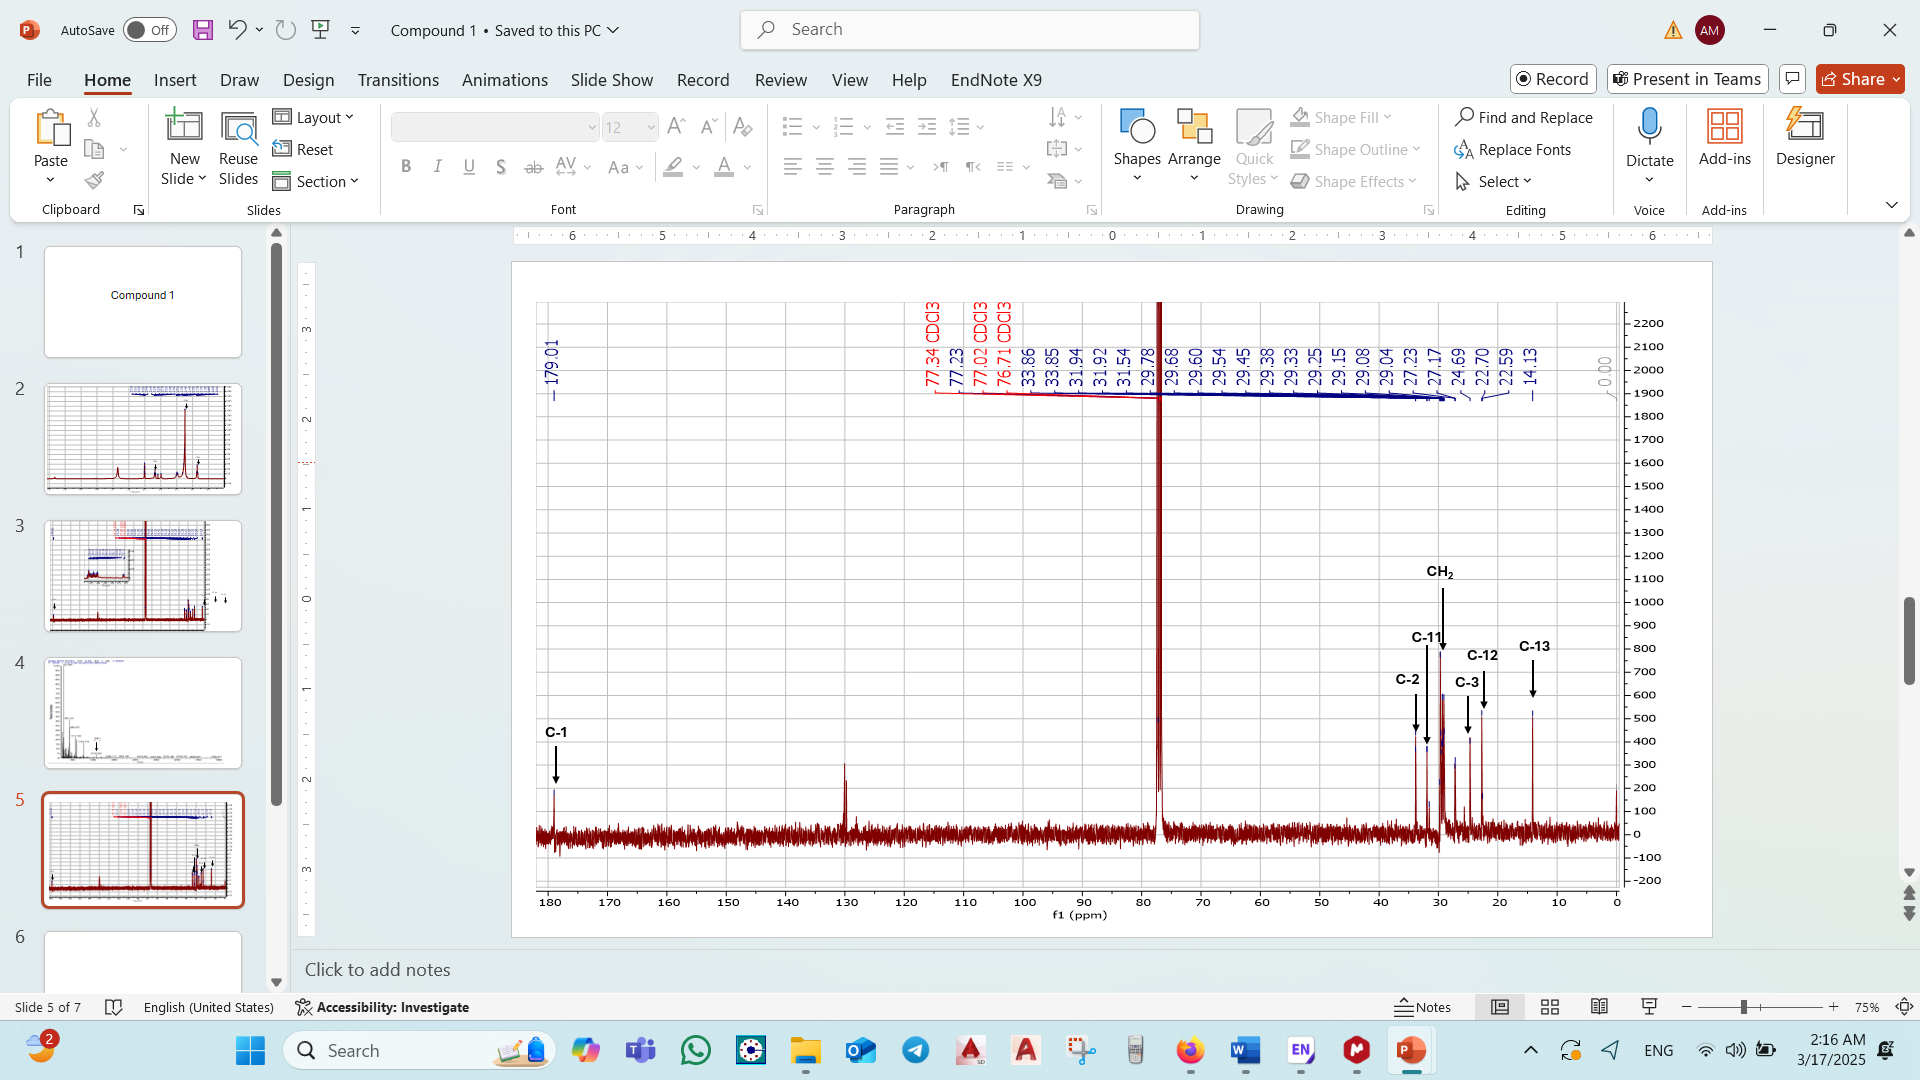


Figure **S15**. 13C-NMR spectrum of Tridecanoic acid (**4**) (100 MHz, CDCl3).

Figure **S16**. EI-MS spectrum of Tridecanoic acid (**4**).


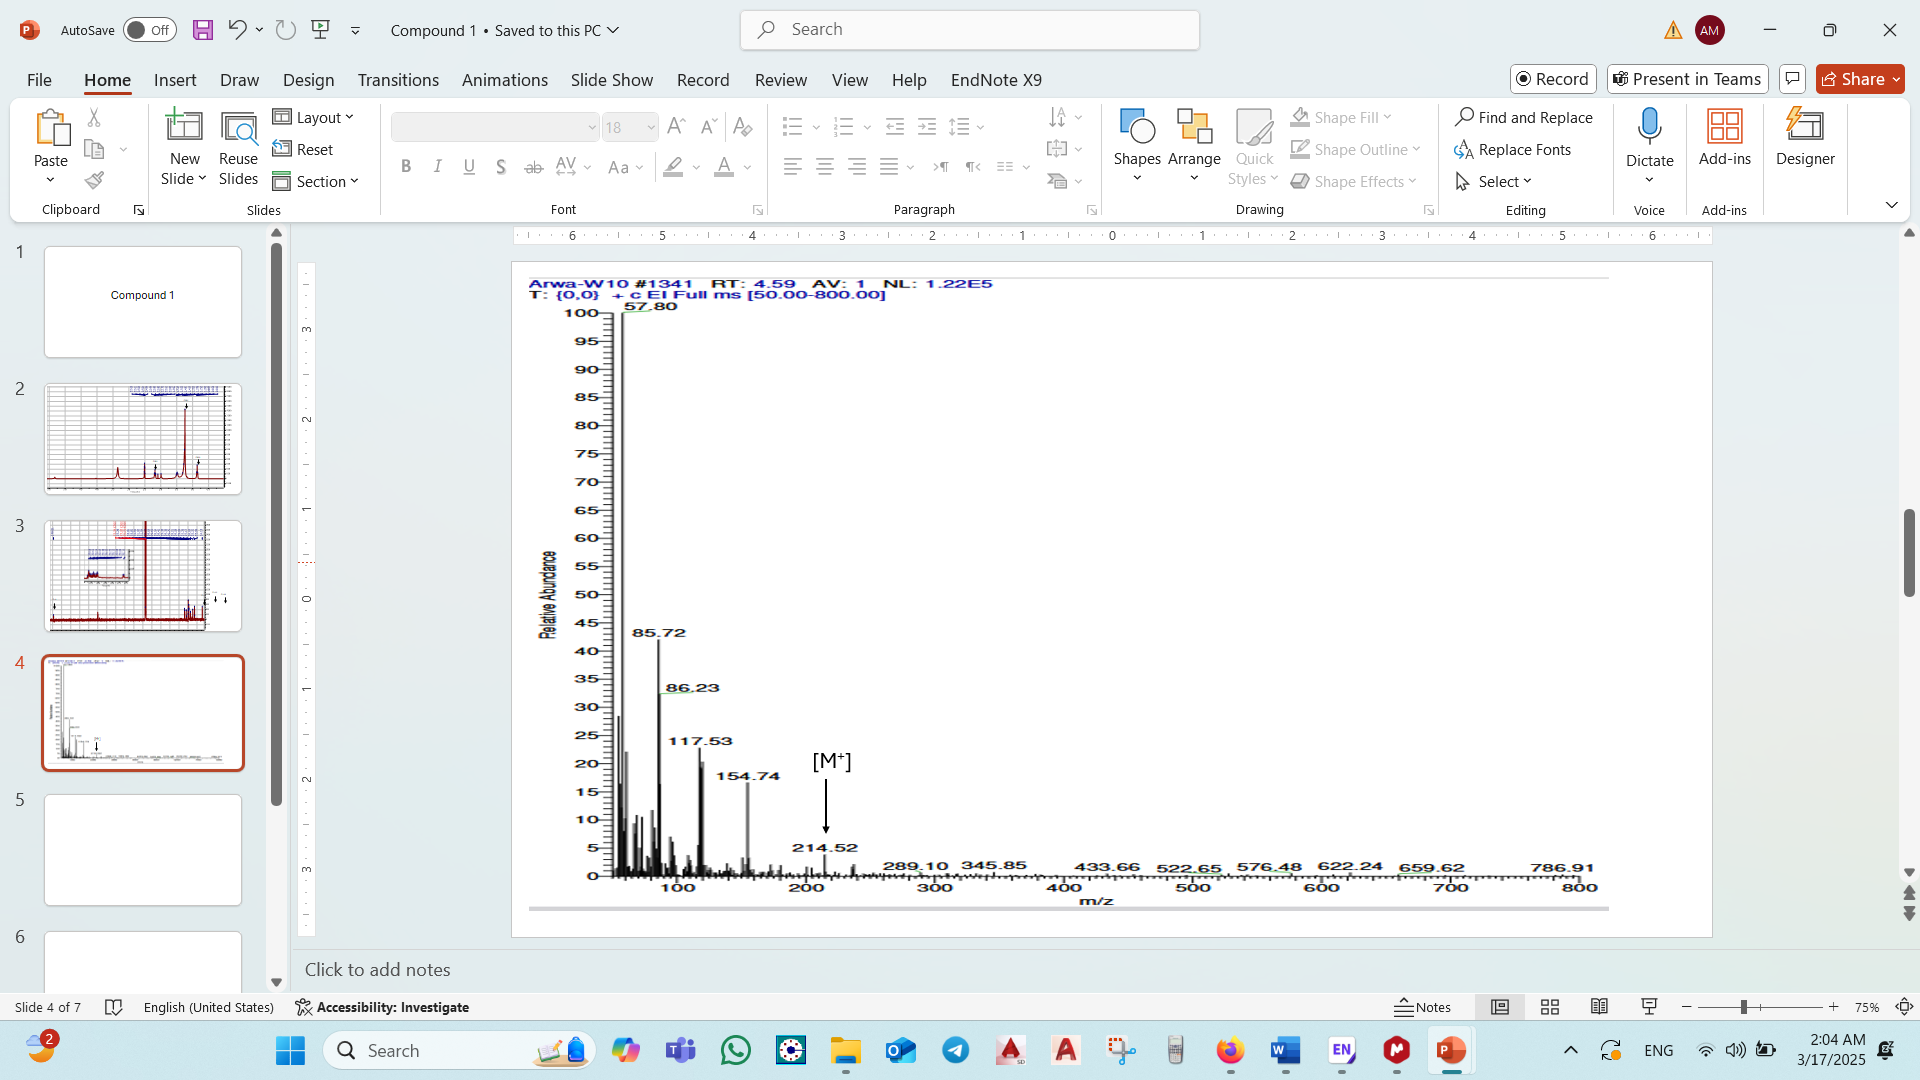

Supplement: Supplementary file 1 [file 764714f283a066cb349009ae.docx]
